# Supplementary material for: α7 nAChR mediated Fas demethylation contributes to prenatal nicotine exposure-induced programmed thymocyte apoptosis in mice
Source: PubMed Central journal article supplement (PMC5706832; doi:10.18632/oncotarget.21526), 2017-10-05
Supplement: oncotarget-08-93741-s001.pdf [file oncotarget-08-93741-s001.pdf]

# $\alpha 7$ nAChR mediated Fas demethylation contributes to prenatal nicotine exposure-induced programmed thymocyte apoptosis in mice

## SUPPLEMENTARY MATERIALS

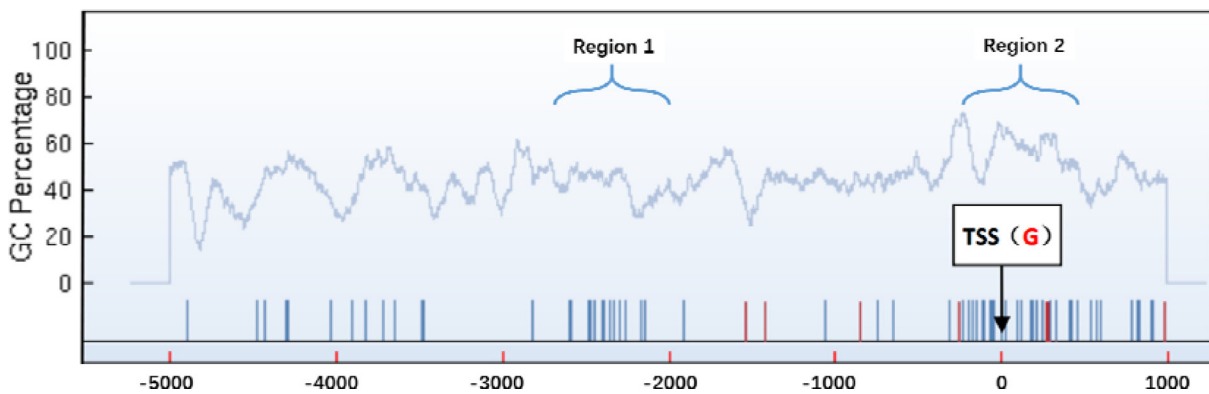

Supplementary Figure 1: Two CpG-rich regions in the Fas promoter. CG dinucleotide positions were shown by vertical lines.

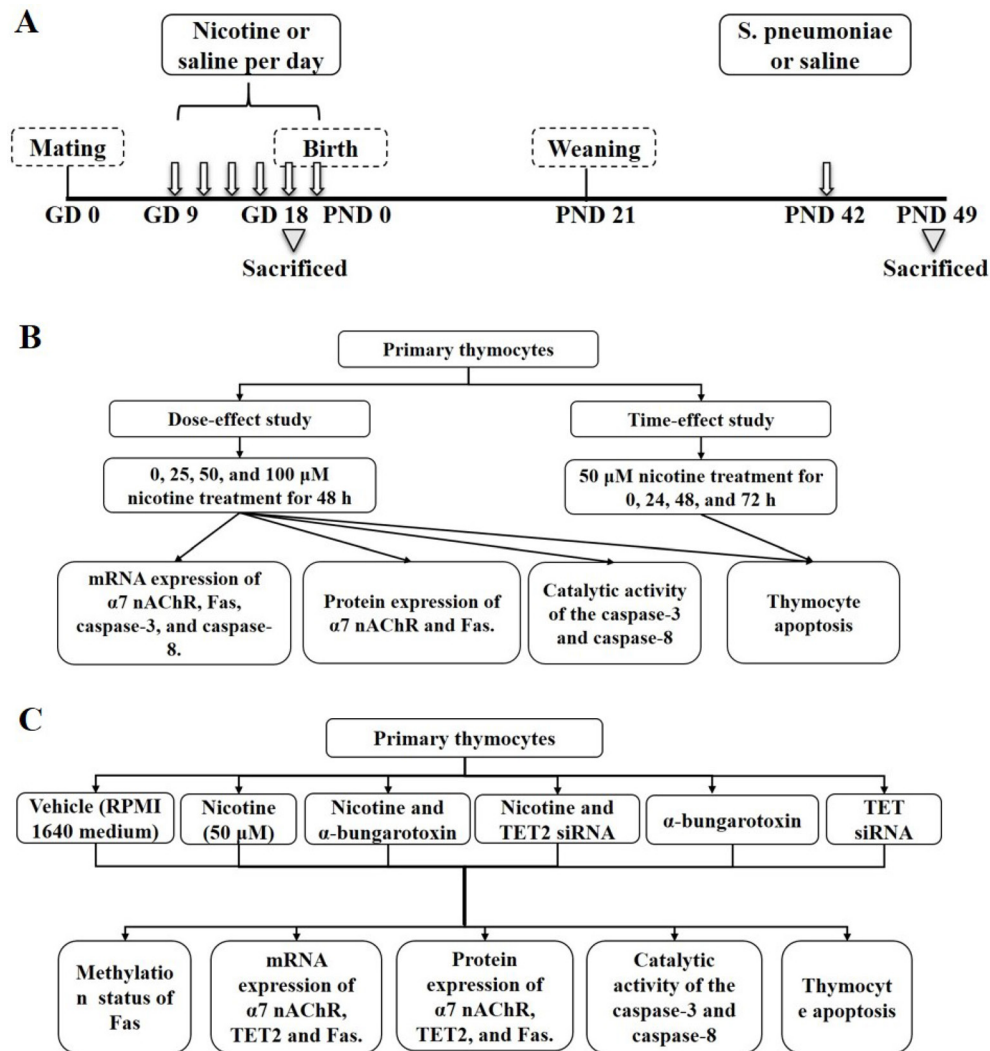

**Supplementary Figure 2: The experimental flow diagram.** (A) Nicotine or saline was administered to pregnant mice from gestational day (GD) 9 to GD 18. On postnatal day (PND) 42, an inflammation model was established via *S. pneumoniae* immunization. Offspring were sacrificed for test on GD 18 and PND 49; (B) The primary thymocytes were treated with different concentrations of nicotine (0, 25, 50, and 100  $\mu$ M) for 48 h, and treated with 50  $\mu$ M nicotine for different durations (0, 24, 48, and 72 h) to investigate the dose-effects and the time-effects of nicotine on thymocyte apoptosis, respectively; (C) The primary thymocytes were treated respectively with vehicle (RPMI 1640 medium), nicotine, nicotine and  $\alpha$ -bungarotoxin, nicotine and TET2 siRNA,  $\alpha$ -bungarotoxin, and TET2 siRNA to study the molecular mechanisms of nicotine's pro-apoptotic effects on thymocytes.

**Supplementary Table 1: Primers and PCR conditions of mouse used in quantitative real-time PCR**

| <b>Genes</b> | <b>Forward primer</b>    | <b>Reverse primer</b> | <b>Product (bp)</b> | <b>Annealing</b> |
|--------------|--------------------------|-----------------------|---------------------|------------------|
| Caspase-3    | CGTGGTTCATCCAGTCCCTTT    | ATTCCGTTGCCACCTTCCT   | 102                 | 60°C, 30 s       |
| Caspase-8    | AGGTACTCGGCCACAGGTTA     | TGGGATGTAGTCCAAGCACA  | 137                 | 60°C, 30 s       |
| Fas          | ATGCACACTCTGCGATGAAG     | CAGTGTTACAGCCAGGAGA   | 120                 | 60°C, 30 s       |
| DNMT1        | AAGAATGGTGTGTCTACCGAC    | CATCCAGGTTGCTCCCCTTG  | 178                 | 60°C, 30 s       |
| DNMT3a       | GAGGGAAGTGAACCCAC        | CTGGAAGGTGAGTCTTGGCA  | 216                 | 62°C, 30 s       |
| DNMT3b       | AGCGGGTATGAGGAGTGCAT     | GGGAGCATCCTTCGTGTCTG  | 72                  | 62°C, 30 s       |
| TET1         | ACACAGTGGTGCTAATGCAG     | AGCATGAACGGGAGAATCGG  | 112                 | 60°C, 30 s       |
| TET2         | AGAGAAGACAATCGAGAAGTCGG  | CCTTCCGTACTCCCAAATCAT | 104                 | 62°C, 30 s       |
| TET3         | TGCGATTGTGTGCGAACAAATAGT | TCCATACCGATCCTCCATGAG | 111                 | 62°C, 30 s       |
| GAPDH        | AACTTTGGCATTGTGGAAGG     | GGATGCAGGGATGATGTTCT  | 132                 | 60°C, 30 s       |

DNMT: DNA methyltransferase; TET: Tet methylcytosine dioxygenase; GAPDH: glyceraldehyde phosphate dehydrogenase.
